# Supplementary material for: A complete twelve-gene deletion null mutant reveals that cyclic di-GMP is a global regulator of phase-transition and host colonization in Erwinia amylovora
Source: PubMed Central journal article supplement (PMC9371280; doi:10.1371/journal.ppat.1010737), 2022-08-01

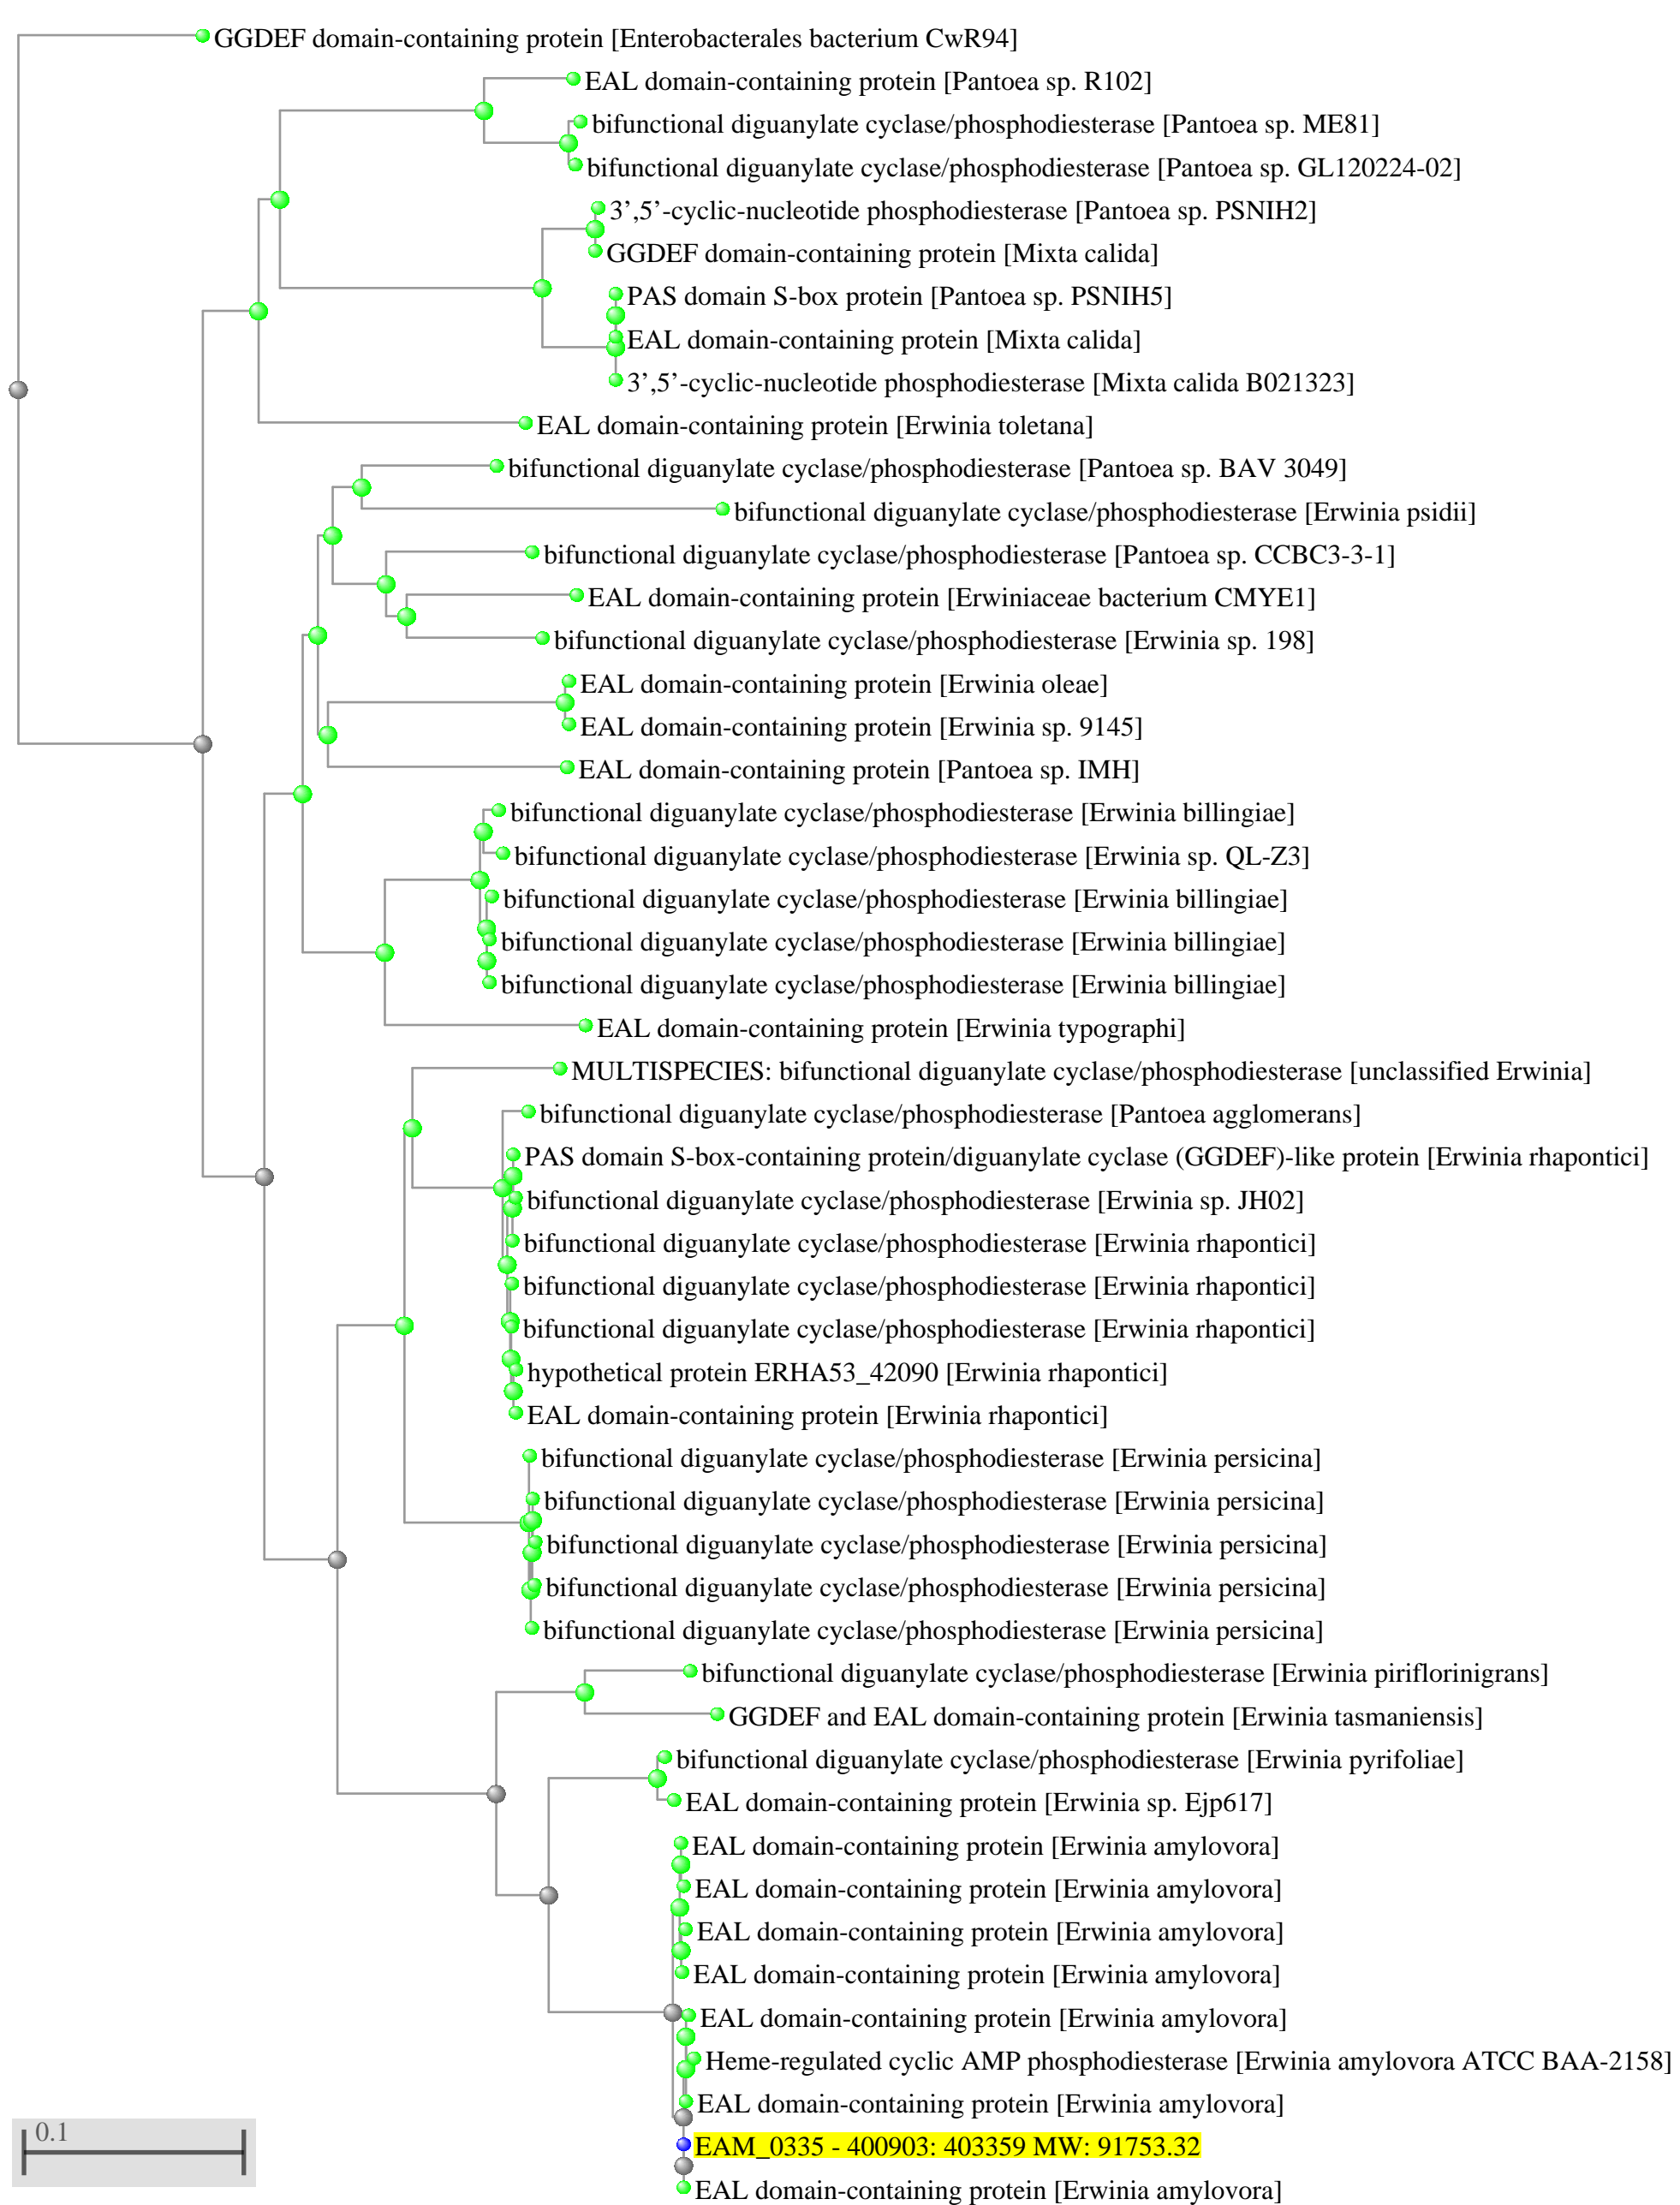

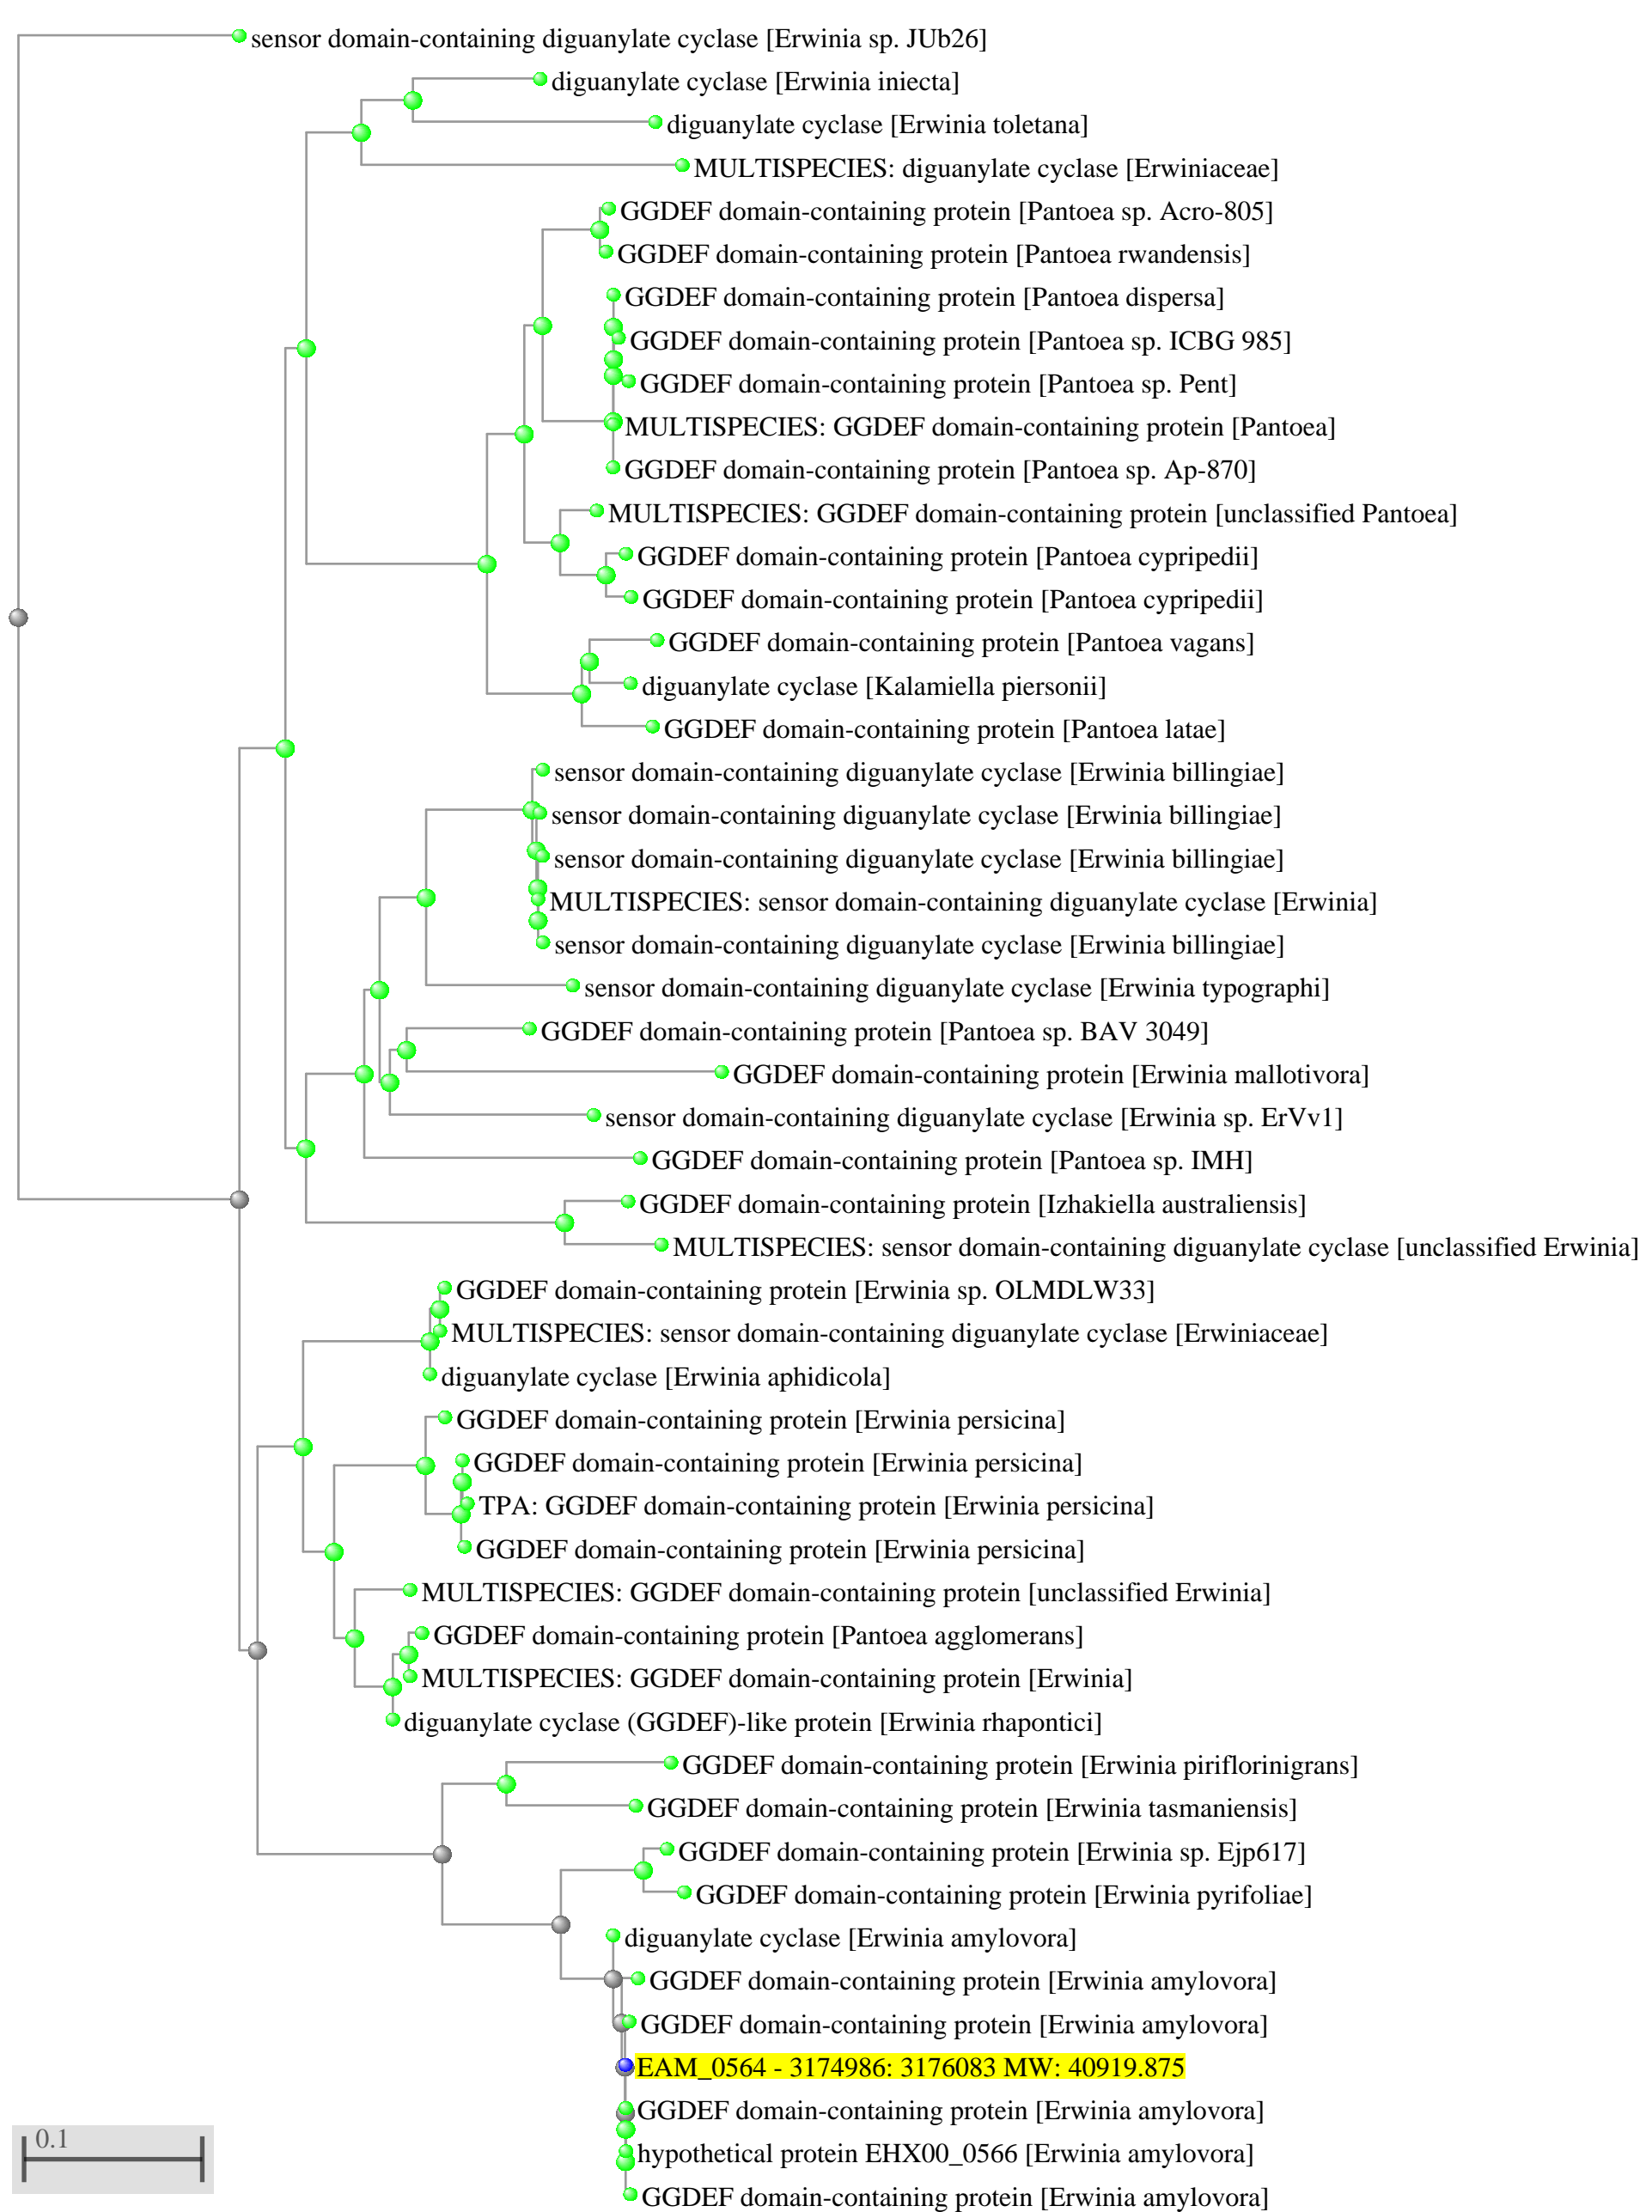

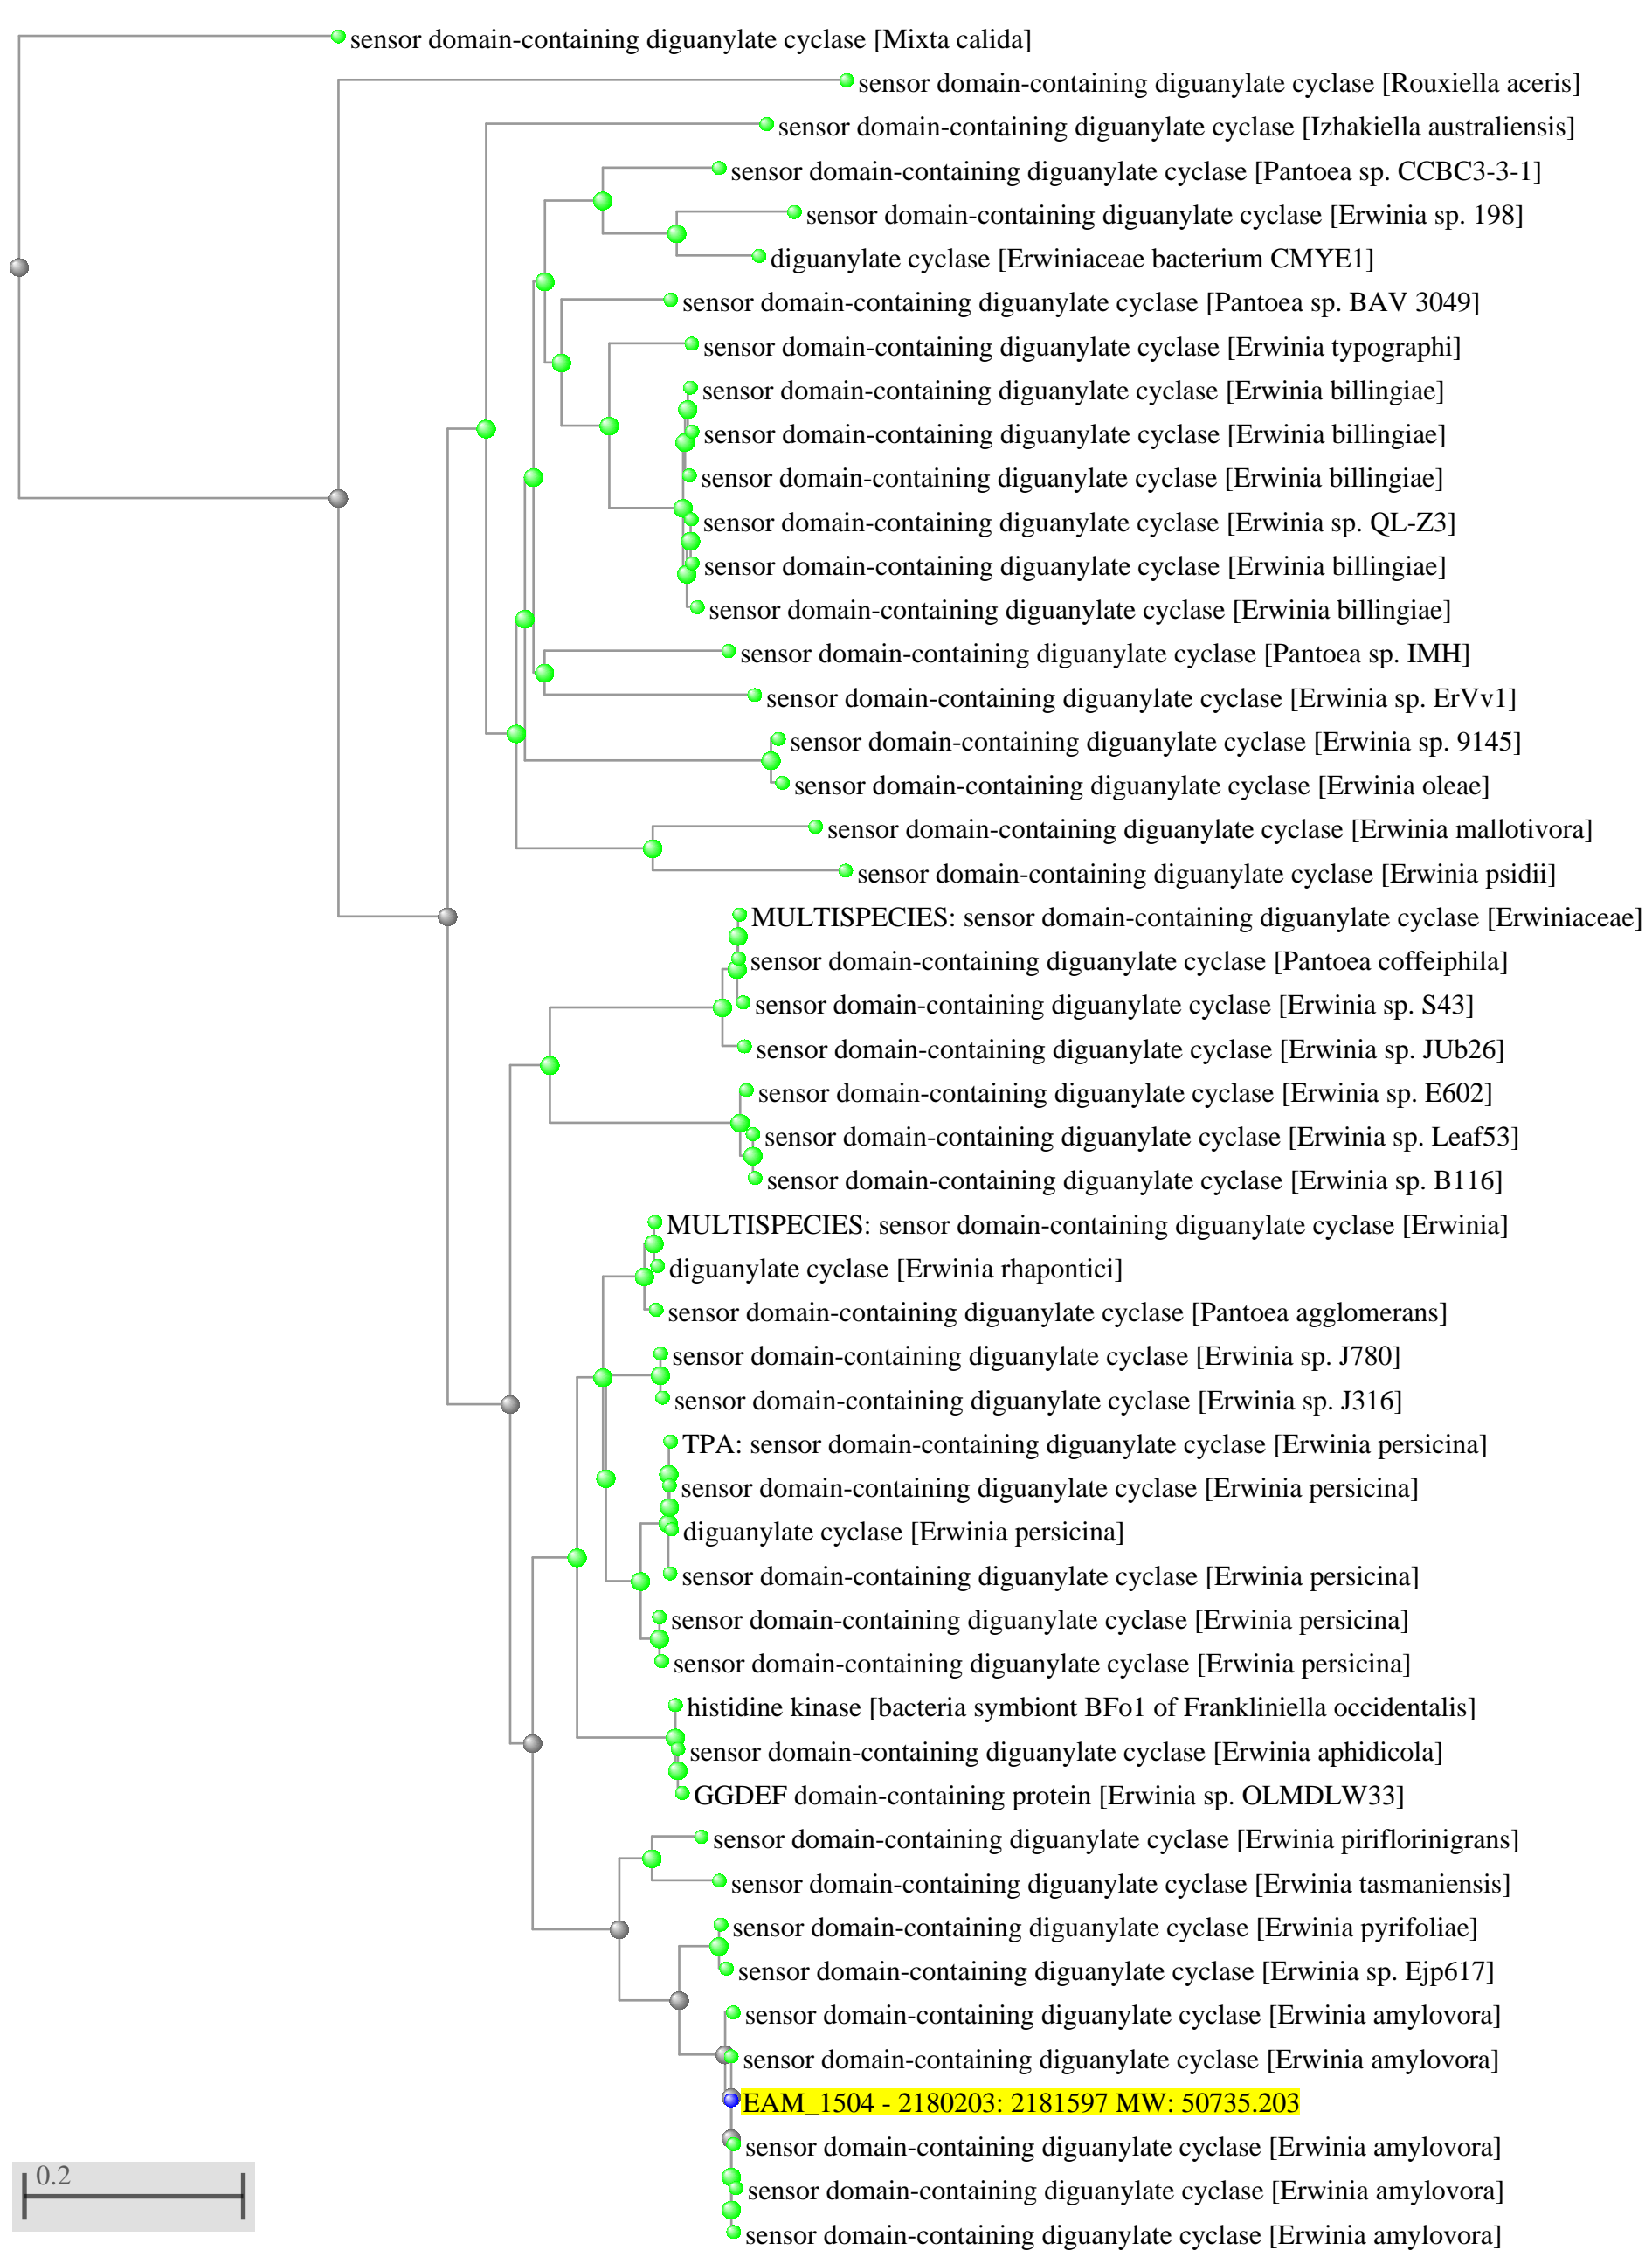

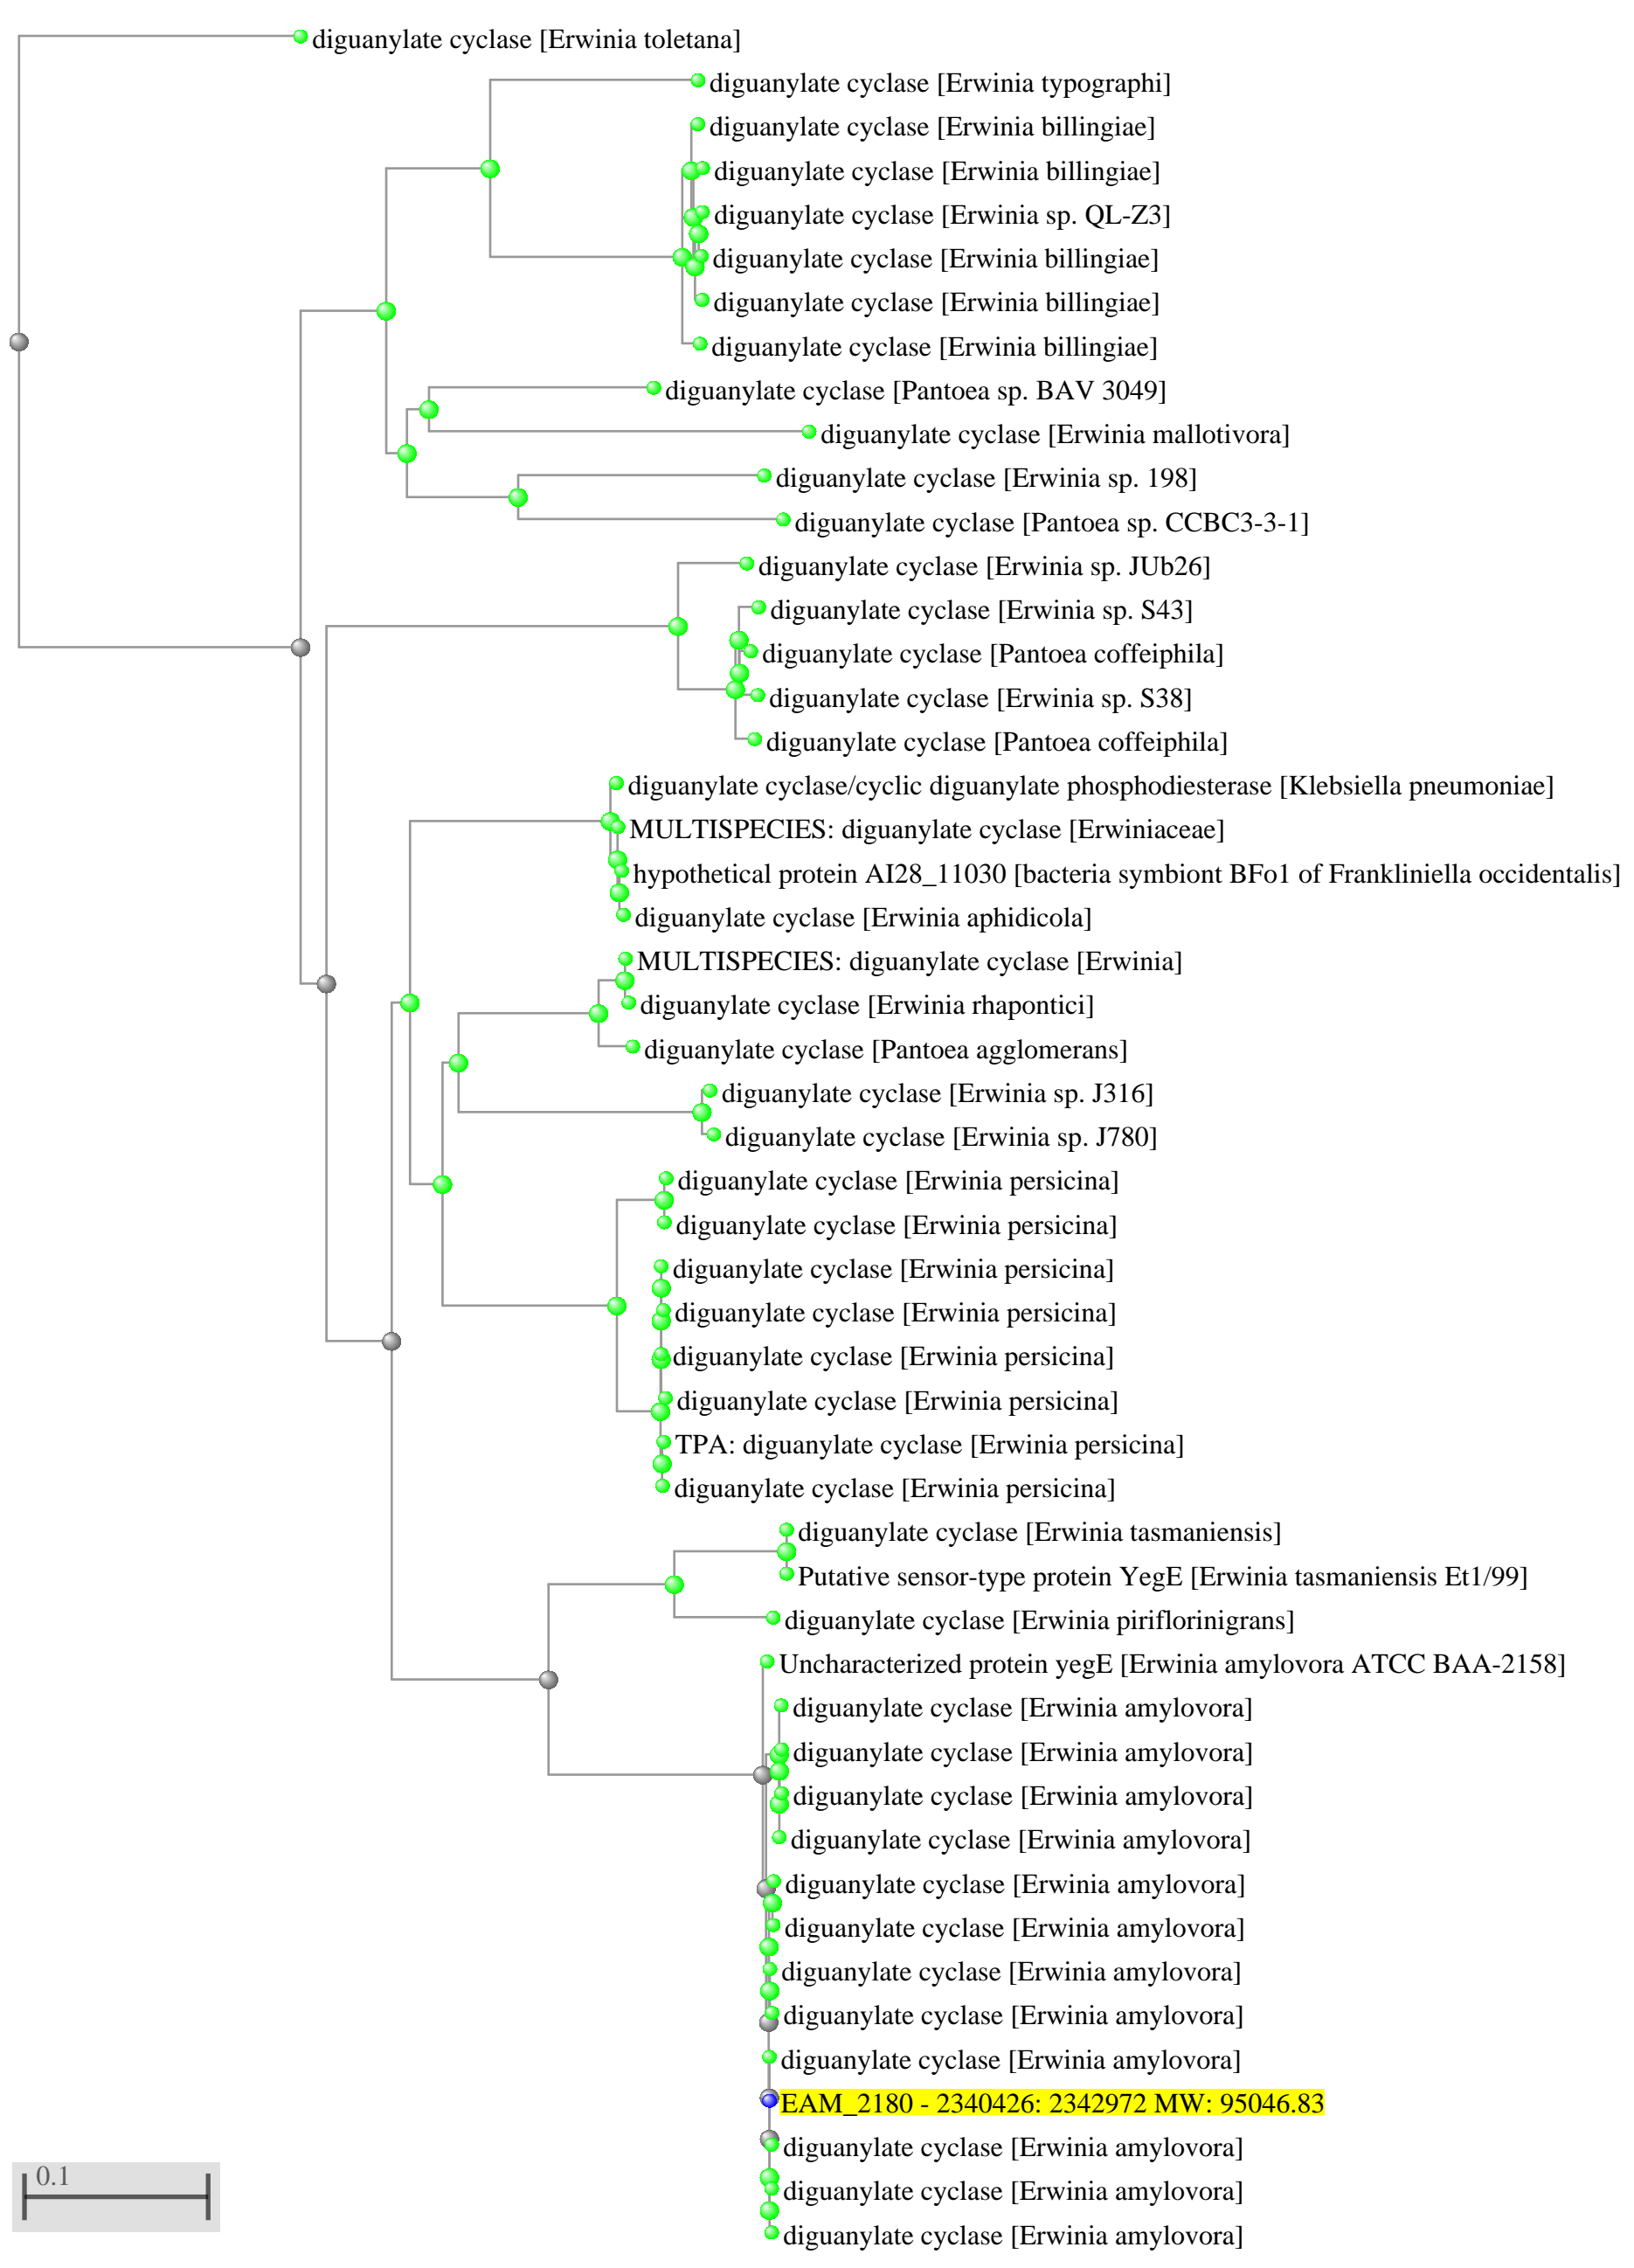

0.1

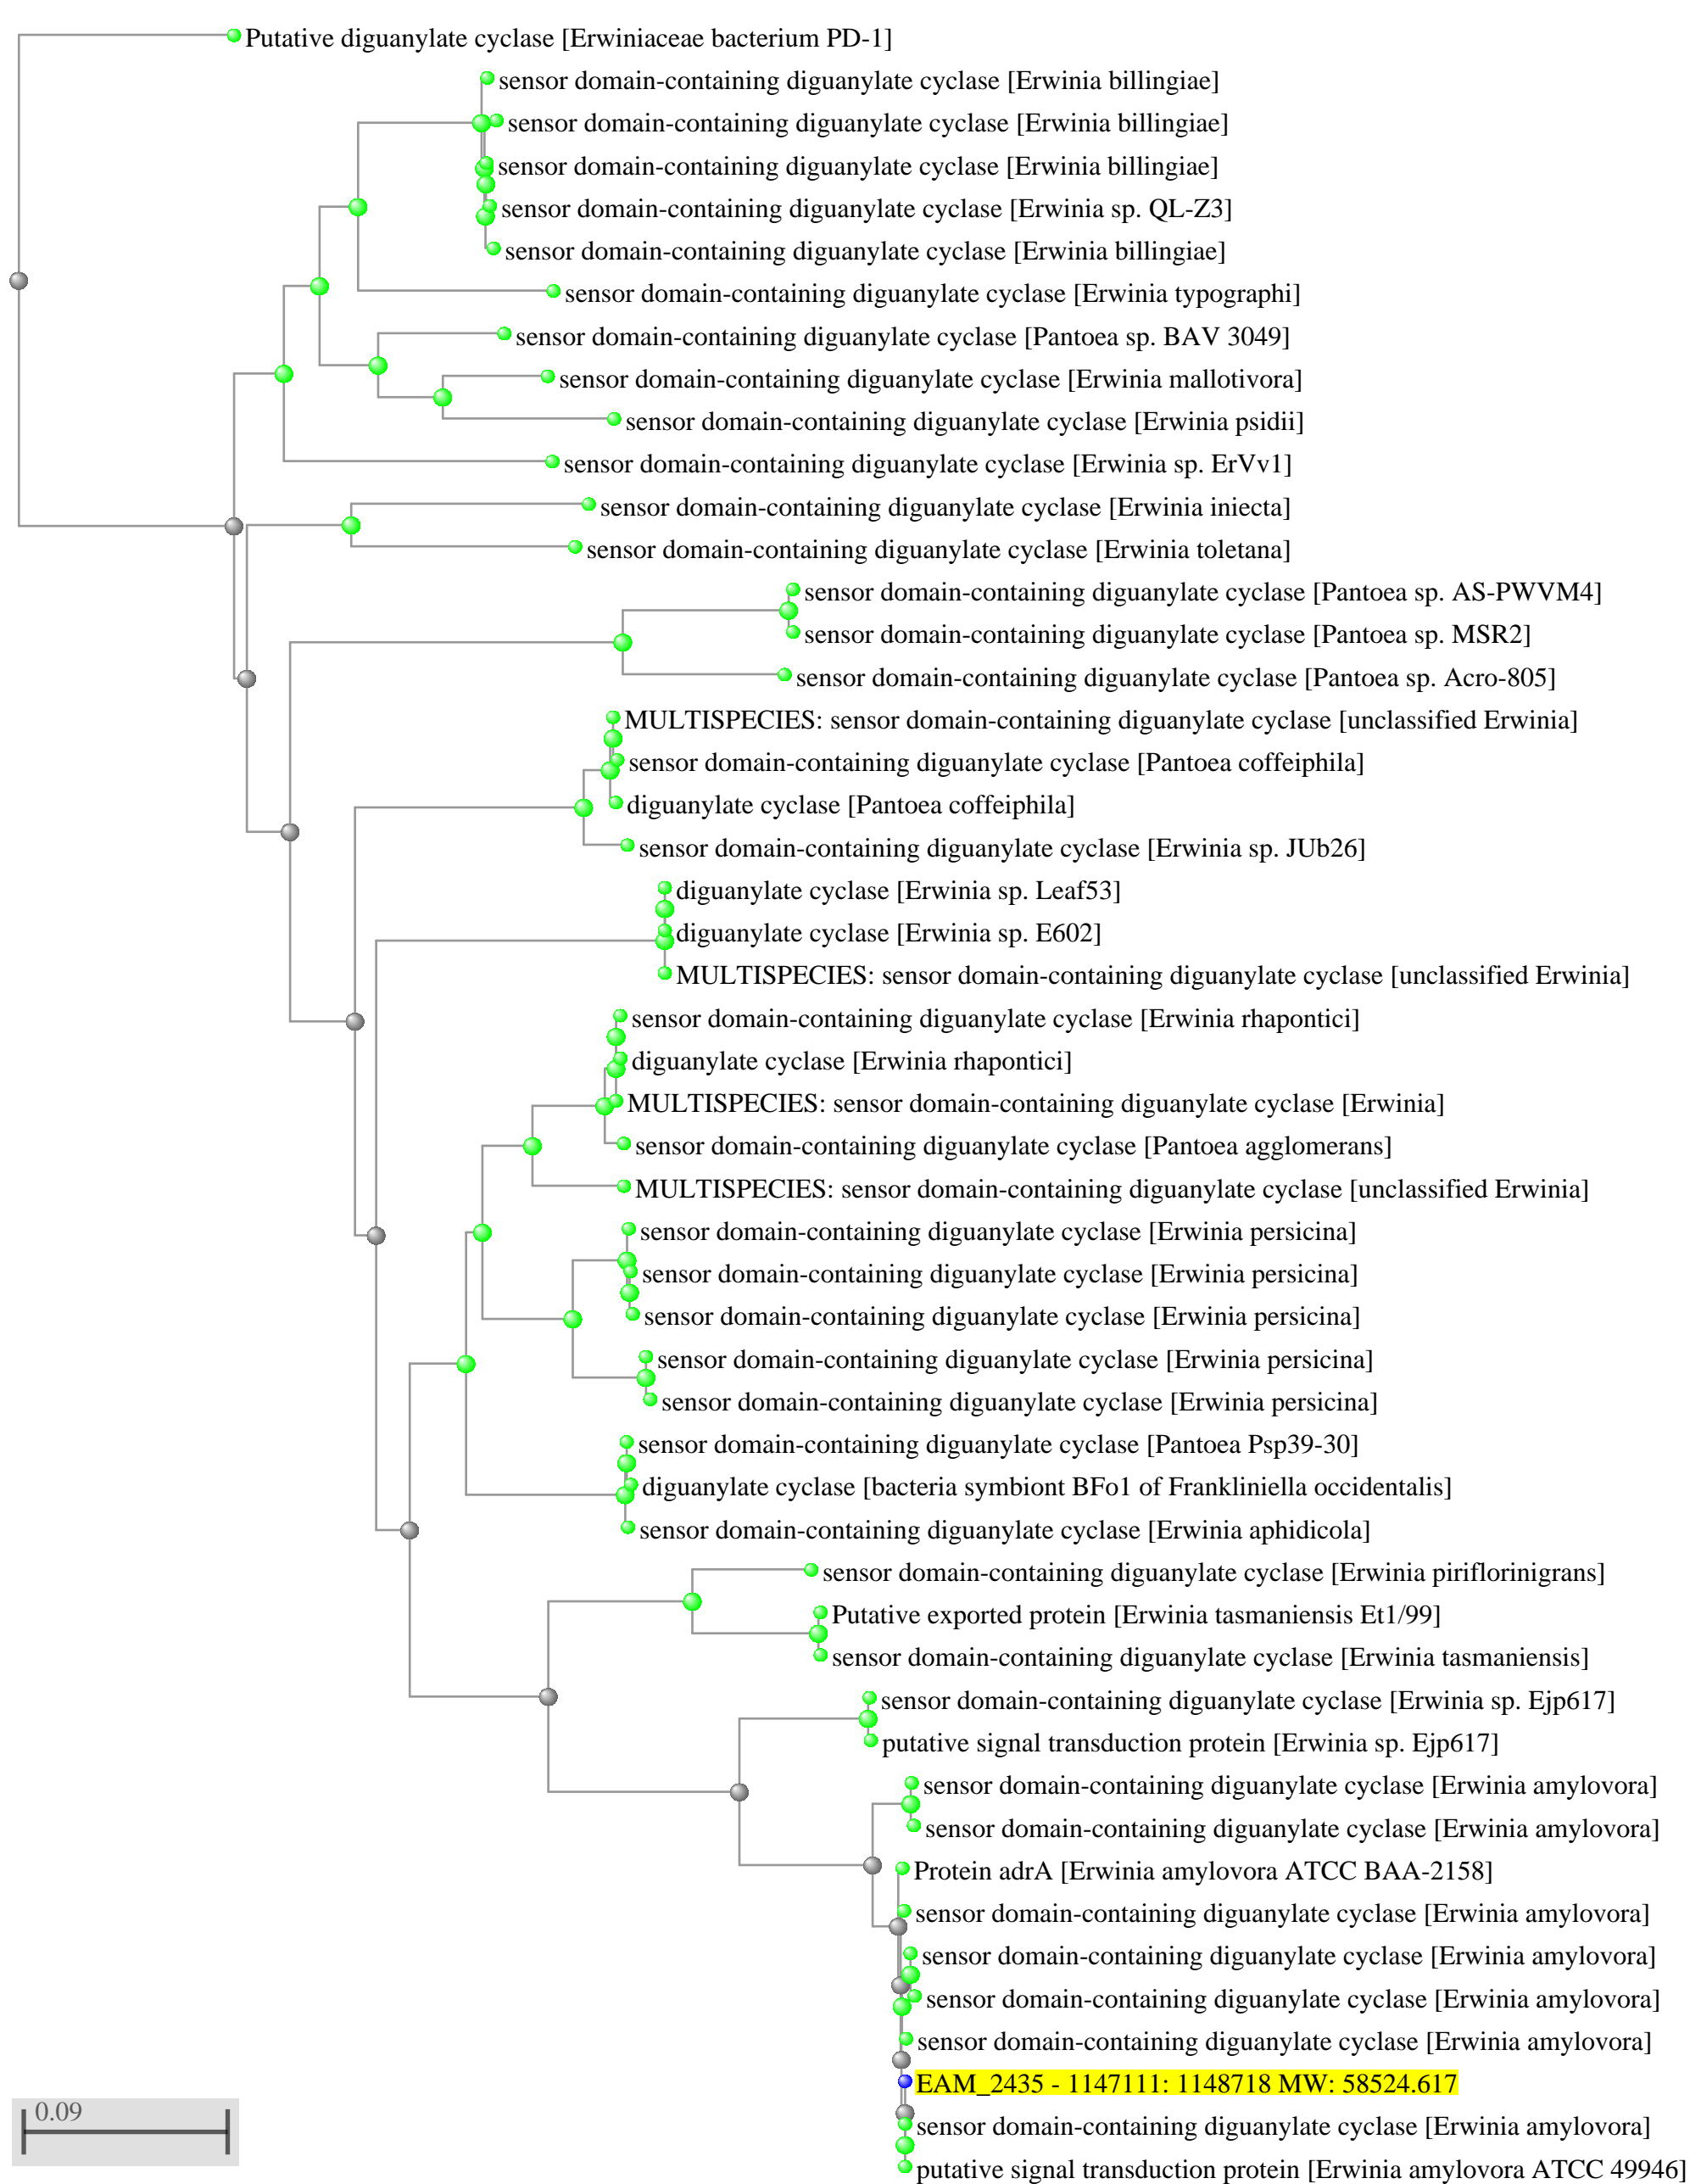

Supplement: ppat.1010737.s003.pdf [file ppat.1010737.s003.pdf]
